# Supplementary material
Source: PubMed Central journal article supplement (PMC5946940)
Supplement: zsy043_suppl_supplementary_material.pdf [file zsy043_suppl_supplementary_material.pdf]

**Supplementary information S1: Comparison of PSG-assessed sleep traits in subjects with insomnia and good sleepers. Means and SD provided.**

| <b>PSG variable</b>                       | <b>Insomnia</b> | <b>Good Sleeper</b> |
|-------------------------------------------|-----------------|---------------------|
| Sleep latency (minutes)                   | 25.6 (22.8)     | 22.3 (36.8)         |
| Wakefulness after sleep onset (minutes)   | 113.7 (84.0)    | 81.5 (55.7)         |
| Sleep efficiency                          | 75.8% (14.6%)   | 80.7% (9.8%)        |
| Total sleep time (minutes)                | 428.5 (98.1)    | 435.3 (78.2)        |
| % of sleep time spent in Stage N1 sleep   | 13.6% (5.5%)    | 15.0% (5.6%)        |
| % of sleep time spent in Stage N2 sleep   | 47.1% (6.2%)    | 48.7% (9.9%)        |
| % of sleep time spent in Stage N3 sleep   | 17.9% (7.5%)    | 16.7% (5.1%)        |
| % of sleep time spent in Stage REM sleep* | 21.5% (4.8%)    | 19.7% (8.7%)        |

\* p<0.05

**Supplementary information S2: Loadings and VIP values of metabolites from different multivariate OPLS-DA models.**

| <b>All timepoints taken together</b> |          |      |                        |          |      |
|--------------------------------------|----------|------|------------------------|----------|------|
| Metabolite                           | Loadings | VIP  | Metabolite             | Loadings | VIP  |
| Isoleucine                           | -0.05    | 1.62 | 2-Hydroxyisovalerate   | 0.04     | 1.63 |
| Lysine                               | -0.03    | 1.29 | 2-Oxoisocaproate       | 0.02     | 1.25 |
| Acetate                              | -0.03    | 1.48 | 2-Oxovalerate          | 0.01     | 1.12 |
| Valine                               | -0.004   | 1.04 | 3-Methyl-2-oxovalerate | 0.02     | 1.22 |
| Pyruvate                             | -0.02    | 1.18 | Propylene glycol       | 0.04     | 1.4  |
| 3-Hydroxybutyrate                    | -0.02    | 1.35 | N-acetyl metabolites   | 0.02     | 1.27 |
| Citrate                              | -0.02    | 1.31 | Proline                | 0.06     | 2.03 |
| Dimethylamine                        | -0.005   | 1.09 | Phenylalanine          | 0.03     | 1.47 |
| Dimethylglycine                      | -0.004   | 1.08 | p-Methylhistidine      | 0.04     | 1.28 |
| Ornithine                            | -0.02    | 1.31 |                        |          |      |
| Serine                               | -0.02    | 1.26 |                        |          |      |
| Creatinine                           | -0.03    | 1.32 |                        |          |      |
| Tyrosine                             | -0.02    | 1.13 |                        |          |      |
| <b>9 am - 5 pm timepoints</b>        |          |      |                        |          |      |
| Metabolite                           | Loadings | VIP  | Metabolite             | Loadings | VIP  |
| Valine                               | -0.03    | 1.3  | Propylene glycol       | 0.04     | 1.41 |
| Isoleucine                           | -0.02    | 1.1  | Lactate                | 0.02     | 1.38 |
| Lysine                               | -0.02    | 1.24 | N-Acetyl metabolites   | 0.02     | 1.24 |
| Acetate                              | -0.03    | 1.4  | Glutamate              | 0.06     | 2.02 |

|                   |        |      |                   |       |      |
|-------------------|--------|------|-------------------|-------|------|
| 3-Hydroxybutyrate | -0.005 | 1.05 | Glycine           | 0.004 | 1.01 |
| Proline           | -0.02  | 1.22 | Tryptophan        | 0.04  | 1.46 |
| Pyruvate          | -0.02  | 1.12 | Phenylalanine     | 0.02  | 1.33 |
| Pyroglutamate     | -0.03  | 1.37 | p-Methylhistidine | 0.05  | 1.57 |
| Glutamine         | -0.01  | 1.14 |                   |       |      |
| Citrate           | -0.01  | 1.16 |                   |       |      |
| Ornithine         | -0.02  | 1.38 |                   |       |      |
| Creatine          | -0.02  | 1.37 |                   |       |      |
| Creatinine        | -0.02  | 1.23 |                   |       |      |
| Serine            | -0.03  | 1.26 |                   |       |      |
| Tyrosine          | -0.03  | 1.24 |                   |       |      |

### 11 pm - 7 am timepoints

| Metabolite    | Loadings | VIP  | Metabolite             | Loadings | VIP  |
|---------------|----------|------|------------------------|----------|------|
| Lysine        | -0.03    | 1.23 | 2-Oxoisocaproate       | 0.04     | 1.51 |
| Acetate       | -0.02    | 1.23 | 3-Methyl-2-oxovalerate | 0.01     | 1.06 |
| Valine        | -0.006   | 1.02 | Isoleucine             | 0.02     | 1.19 |
| Glutamine     | -0.03    | 1.3  | Lactate                | 0.03     | 1.37 |
| Citrate       | -0.01    | 1.1  | Leucine                | 0.02     | 1.35 |
| Dimethylamine | -0.009   | 1.09 | N-Acetyl metabolites   | 0.03     | 1.26 |
| Creatinine    | -0.03    | 1.23 | Proline                | 0.03     | 1.28 |
| Ornithine     | -0.02    | 1.19 |                        |          |      |
| Pyruvate      | -0.02    | 1.15 |                        |          |      |
| Glucose       | -0.02    | 1.27 |                        |          |      |

---

|                   |       |      |
|-------------------|-------|------|
| Fructose          | -0.03 | 1.35 |
| 3-Hydroxybutyrate | -0.03 | 1.29 |
| Tyrosine          | -0.02 | 1.06 |

---

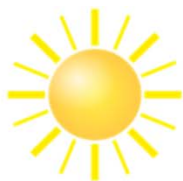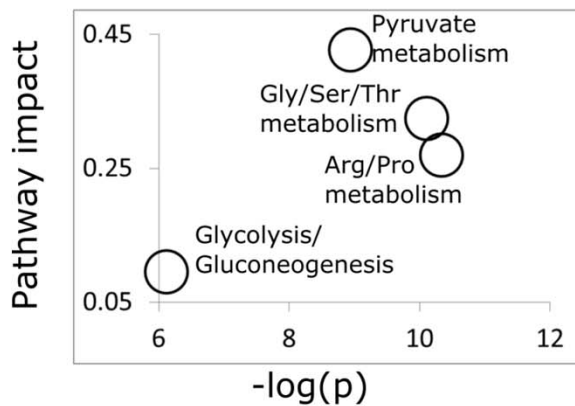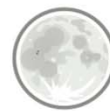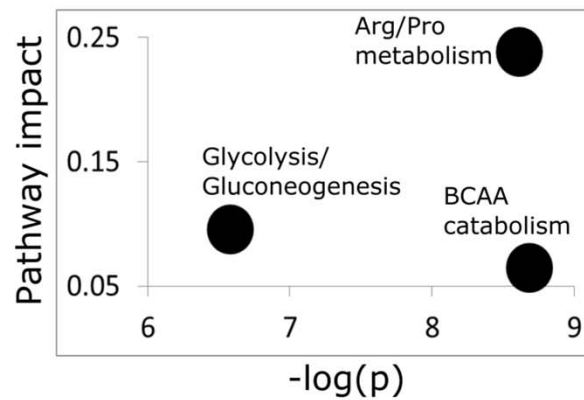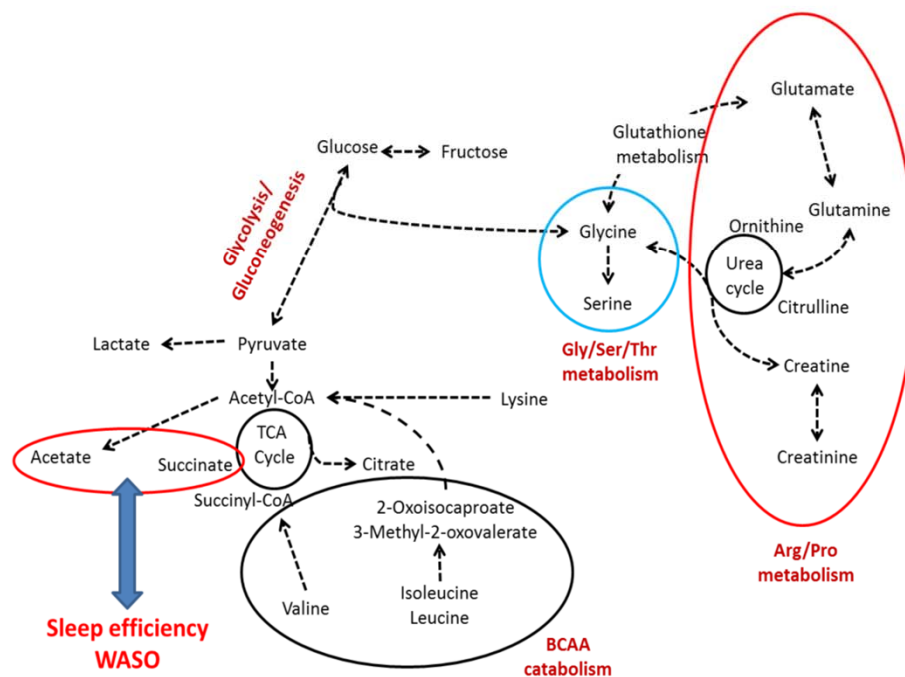

**Supplementary Table S4: AUC analysis of carbohydrate metabolites and branched chain amino acids in insomnia and control group across nighttime normalized to 11 pm concentration. Figure 4 shows the temporal change of the metabolites. Only second night is considered for the analysis.**

| <b>AUC</b>                                  | <b>Control</b> | <b>Insomnia</b> | <b>Fold change</b> |
|---------------------------------------------|----------------|-----------------|--------------------|
| <b>Carbohydrate metabolites</b>             |                |                 |                    |
| <b>Glucose</b>                              | 29971.30       | 32649.34        | 1.09               |
| <b>Acetate</b>                              | 581.20         | 659.50          | 1.13               |
| <b>Tyrosine</b>                             | 450.00         | 519.24          | 1.15               |
| <b>Branched chain amino acid metabolite</b> |                |                 |                    |
| <b>2-Oxoisocaproate</b>                     | 287.12         | 262.77          | 0.91               |
